# Supplementary material for: Breakfast Quality and Insulin Resistance in Spanish Schoolchildren: A Cross-Sectional Study
Source: MDPI journal article supplement (doi:10.3390/ijerph20021181), 2023-01-09
Supplement: s1 [file s1]

**Table S1.** Dietary data for breakfast and daily according to sex.

|                                    | <b>Total<br/>(n=852)</b> | <b>Girls (n=440)</b> | <b>Boys (n=412)</b> |
|------------------------------------|--------------------------|----------------------|---------------------|
| <b>Dietary intake at breakfast</b> |                          |                      |                     |
| Fruits and juice(g/day)            | 29.4±57.3                | <b>33.2±59.4</b>     | <b>25.4±54.8*</b>   |
| Fruits (g/day)                     | 7.7±28.1                 | 8.5±29.2             | 6.8±26.9            |
| Juices (g/day)                     | 21.7±50.6                | <b>24.7±53.3</b>     | <b>18.6±47.3*</b>   |
| Dairy (g/day)                      | 201.6±68.5               | 199.1±69.2           | 204.3±67.7          |
| Cereals (g/day)                    | 15.3±18.3                | 15.9±18.1            | 14.6±18.5           |
| Olive oil (g/day)                  | 0.56±1.59                | 0.58±1.66            | 0.54±1.51           |
| Butter or margarine(g/day)         | 1.98±4.08                | 1.98±3.97            | 1.98±4.20           |
| Butter (g/day)                     | 1.35±3.40                | 1.36±3.57            | 1.33±3.22           |
| Margarine (g/day)                  | 0.63±2.57                | 0.61±2.14            | 0.65±2.96           |
| Energy intake (kcal)               | 371±138                  | 362±130              | 381±147             |
| Energy intake (% kcal/day)         | 17.7±5.8                 | 17.5±5.8             | 17.8±5.9            |
| Proteins (% kcal/day)              | 2.16±0.82                | 2.18±0.73            | 2.15±0.90           |
| Lipids (% kcal/day)                | 6.4±2.9                  | 6.3±2.9              | 6.6±2.9             |
| SFA (% kcal/day)                   | 3.1±1.3                  | <b>3.0±1.3</b>       | <b>3.2±1.3*</b>     |
| MUFA (% kcal/day)                  | 2.0±1.1                  | 1.9±1.1              | 2.0±1.1             |
| PUFA (% kcal/day)                  | 0.49±0.41                | 0.49±0.38            | 0.49±0.44           |
| Carbohydrates (% kcal/day)         | 8.9±3.2                  | 9.0±3.2              | 8.8±3.2             |
| Simple sugar (% kcal/day)          | 5.5±2.1                  | 5.5±2.1              | 5.4±2.1             |
| Free sugar (% kcal/day)            | 2.40±1.46                | 2.40±1.52            | 2.40±1.39           |
| Fibre (g/day)                      | 1.87±1.80                | 1.93±2.13            | 1.82±1.37           |
| Calcium(mg/day)                    | 322.1±105.5              | 317.4±106.5          | 327.1±104.3         |
| <b>Daily dietary intake</b>        |                          |                      |                     |
| HEI-2015 (score) #                 | 59.1±8.5                 | <b>60.3±8.5</b>      | <b>57.9±8.4*</b>    |
| Energy intake (kcal/day)           | 2105±350                 | <b>2066±338</b>      | <b>2146±358*</b>    |
| Underestimation (%) #              | -1.8±22.8                | <b>-10.7±22.8</b>    | <b>7.8±18.6*</b>    |
| Proteins (% kcal/day)              | 15.6±2.3                 | 15.6±2.3             | 15.5±2.3            |
| Lipids (% kcal/day)                | 41.8±4.8                 | 41.8±4.7             | 41.8±4.9            |
| SFA (% kcal/day)                   | 14.4±2.1                 | <b>14.2±2.1</b>      | <b>14.6±2.2*</b>    |
| MUFA (% kcal/day) #                | 16.9±2.7                 | 16.9±2.8             | 16.9±2.7            |
| PUFA (% kcal/day)                  | 5.9±1.8                  | <b>6.0±1.9</b>       | <b>5.7±1.6*</b>     |
| Carbohydrates (% kcal/day)         | 41.0±5.1                 | 40.9±5.0             | 41.1±5.2            |
| Simple sugar (% kcal/day) #        | 20.4±4.6                 | 20.4±4.5             | 20.4±4.7            |
| Free sugar (% kcal/day)            | 8.5±3.6                  | 8.3±3.6              | 8.7±3.6             |
| Fibre (g/day)                      | 16.3±4.8                 | 16.4±4.8             | 16.3±4.7            |
| Calcium(mg/day) #                  | 965.0±221.9              | <b>946.6±217.8</b>   | <b>984.6±224.9*</b> |

Data are shown as mean ± standard deviation. MUFA: monounsaturated fatty acids; PUFA: polyunsaturated; SFA: saturated fatty acids. HEI-2015: healthy eating index. Most variables follow a non-parametric distribution; variables with normal distribution were marked (#). For a comparison of means, the Mann–Whitney U-test was used if the distribution of variables was not normal, and Student's t-test for normal distributions. Differences between sexes are indicated by asterisks and bold type (\*p<0.05).

**Table S2.** Anthropometric, biochemical and dietary data for breakfast, and daily according to BQI tertiles.

|                                    | Total             |                   |                     | Girls            |                   |                    | Boys             |                   |                    |
|------------------------------------|-------------------|-------------------|---------------------|------------------|-------------------|--------------------|------------------|-------------------|--------------------|
|                                    | T1 (n=157)        | T2 (n=347)        | T3 (n=348)          | T1 (n=73)        | T2 (n=174)        | T3 (n=193)         | T1 (n=84)        | T2 (n=173)        | T3 (n=155)         |
| <b>Anthropometric data</b>         |                   |                   |                     |                  |                   |                    |                  |                   |                    |
| BMI (kg/m <sup>2</sup> )           | 18.8±2.8          | 18.9±3.0          | 19.0±3.3            | 18.9±2.8         | 18.9±2.9          | 18.9±3.1           | 18.7±2.7         | 19.0±3.2          | 19.2±3.6           |
| zBMI- S                            | 0.63±1.03         | 0.68±1.12         | 0.70±1.18#          | 0.58±1.04        | 0.56±1.01         | 0.58±1.08#         | 0.68±1.03        | 0.81±1.21         | 0.86±1.29          |
| Body fat (%)                       | 27.1±5.5          | 27.7±5.6          | 27.7±5.8            | 29.5±4.4         | 29.5±4.5          | 29.1±4.9#          | 25.1±5.5         | 25.8±6.1          | 26.1±6.3           |
| <b>Physical Activity</b>           |                   |                   |                     |                  |                   |                    |                  |                   |                    |
| Activity coefficient               | 1.52±0.11         | 1.52±0.11         | 1.54±0.10           | 1.52±0.12        | 1.52±0.11         | 1.52±0.10#         | 1.53±0.11        | <b>1.52±0.10</b>  | <b>1.55±0.11b</b>  |
| <b>Biochemical data</b>            |                   |                   |                     |                  |                   |                    |                  |                   |                    |
| Glucose (mg/dL) – S                | 83.9±10.1         | 84.3±10.2         | 84.8±8.9            | 81.7±9.5         | 83.4±11.2         | 83.9±8.9           | 85.7±10.3        | 85.1±9.1          | 85.8±8.8           |
| Insulin (mcU/mL) – S               | 6.4±4.7           | 6.3±4.3           | 6.2±4.3             | 6.9±5.5          | 7.1±4.5           | 7.1±4.8            | 5.9±3.9          | 5.6±3.8           | 5.2±3.2            |
| HOMA-IR – S                        | 1.35±1.13         | 1.33±0.93         | 1.31±0.92           | 1.45±1.37        | 1.48±1.00         | 1.49±1.04          | 1.27±0.88        | 1.18±0.84         | 1.09±0.70          |
| <b>Dietary intake at breakfast</b> |                   |                   |                     |                  |                   |                    |                  |                   |                    |
| Fruits and juice (g/day) -B        | 7.9±38.0          | <b>20.5±51.0a</b> | <b>48.0±64.6ab</b>  | <b>11.7±50.2</b> | <b>19.6±49.6</b>  | <b>53.5±64.3ab</b> | <b>4.5±22.4</b>  | <b>21.4±52.5a</b> | <b>41.2±64.4ab</b> |
| Fruit (g/day) -B                   | <b>1.5±11.8</b>   | <b>4.5±19.7</b>   | <b>13.7±37.8ab</b>  | <b>1.6±14.0</b>  | <b>3.4±14.2</b>   | <b>15.7±40.1ab</b> | <b>1.4±9.4</b>   | <b>5.5±24.0</b>   | <b>11.3±34.7ab</b> |
| Juices (g/day) -B                  | <b>6.4±35.6</b>   | <b>16.1±47.4</b>  | <b>34.3±56.2ab</b>  | <b>10.0±48.6</b> | <b>16.2±47.6</b>  | <b>37.9±57.0ab</b> | <b>3.2±17.6</b>  | <b>15.9±47.3</b>  | <b>29.9±55.2ab</b> |
| Dairy (g/day) -B                   | <b>186.5±94.1</b> | <b>201.3±61.9</b> | <b>208.8±59.6ab</b> | 186.0±94.1       | <b>194.5±62.3</b> | <b>208.1±62.8b</b> | 186.9±94.7       | 208.1±60.8        | 209.7±55.4         |
| Cereals (g/day) -B                 | <b>11.2±20.4</b>  | <b>9.9±16.4</b>   | <b>22.5±16.7ab</b>  | <b>9.7±15.9</b>  | <b>11.2±17.7</b>  | <b>22.5±17.2ab</b> | <b>12.4±23.6</b> | <b>8.6±15.1</b>   | <b>22.5±16.1ab</b> |
| Olive oil(g/day) -B                | <b>0.01±0.13</b>  | <b>0.08±0.62</b>  | <b>1.29±2.21ab</b>  | <b>0.00±0.00</b> | <b>0.10±0.69</b>  | <b>1.23±2.25ab</b> | <b>0.02±0.18</b> | <b>0.06±0.55</b>  | <b>1.37±2.15ab</b> |
| Butter or margarine (g/day) -B     | <b>3.30±5.53</b>  | <b>1.74±3.60a</b> | <b>1.62±3.63a</b>   | <b>3.19±4.87</b> | 1.81±3.85         | <b>1.67±3.63a</b>  | <b>3.40±6.07</b> | 1.67±3.34         | <b>1.56±3.65a</b>  |
| Butter (g/day)                     | 1.86±4.26         | 1.30±3.28         | 1.16±3.06           | 1.93±4.51        | 1.26±3.50         | 1.24±3.23          | 1.80±4.06        | 1.35±3.06         | 1.05±2.85          |
| Margarine (g/day) -B               | <b>1.45±4.22</b>  | <b>0.43±1.74a</b> | <b>0.46±2.19a</b>   | <b>1.26±2.87</b> | 0.55±1.92         | <b>0.43±1.95a</b>  | 1.61±5.12        | 0.32±1.54         | 0.51±2.46          |
| Energy intake (kcal/day) -SB       | <b>383±186</b>    | <b>342±123a</b>   | <b>394±122ab</b>    | 368±168          | <b>326±107</b>    | <b>392±124b</b>    | 397±201          | <b>358±136</b>    | <b>397±119b</b>    |
| (% kcal/day) -B                    | <b>18.4±7.2</b>   | <b>16.4±5.4a</b>  | <b>18.7±5.3b</b>    | 17.7±6.9         | <b>16.1±5.2</b>   | <b>18.7±5.6b</b>   | <b>19.1±7.5</b>  | <b>16.6±5.5a</b>  | <b>18.6±5.0b</b>   |
| Proteins (% kcal/day) -B           | <b>1.98±0.77</b>  | <b>2.00±0.63</b>  | <b>2.41±0.94ab</b>  | <b>1.99±0.74</b> | <b>2.00±0.65</b>  | <b>2.41±0.74ab</b> | <b>1.97±0.80</b> | <b>2.00±0.61</b>  | <b>2.41±1.14ab</b> |
| Lipids (% kcal/day) -B             | <b>7.0±3.7</b>    | <b>5.8±2.6a</b>   | <b>6.7±2.6b</b>     | <b>6.7±3.8</b>   | <b>5.6±2.5a</b>   | <b>6.7±2.7b</b>    | 7.1±3.7          | 6.1±2.6a          | 6.8±2.5#           |
| SFA (% kcal/day) #                 | 3.3±1.8           | 3.0±1.3           | 3.0±1.2             | 3.2±1.8          | 2.8±1.2           | 3.0±1.2            | 3.4±1.8          | 3.1±1.3           | 3.1±1.1            |
| MUFA (% kcal/day) -B               | <b>2.0±1.3</b>    | <b>1.7±0.9a</b>   | <b>2.2±1.1ab</b>    | 2.0±1.4          | <b>1.7±0.9</b>    | <b>2.2±1.2b</b>    | 2.0±1.3          | <b>1.8±0.9</b>    | <b>2.2±1.0b</b>    |

|                               | Total              |                   |                     | Girls              |                   |                      | Boys             |                     |                     |
|-------------------------------|--------------------|-------------------|---------------------|--------------------|-------------------|----------------------|------------------|---------------------|---------------------|
|                               | T1 (n=157)         | T2 (n=347)        | T3 (n=348)          | T1 (n=73)          | T2 (n=174)        | T3 (n=193)           | T1 (n=84)        | T2 (n=173)          | T3 (n=155)          |
| PUFA (% kcal/day)             | 0.52±0.50          | <b>0.45±0.39</b>  | <b>0.51±0.38b</b>   | 0.51±0.47          | <b>0.44±0.35</b>  | <b>0.52±0.36b</b>    | 0.52±0.52        | <b>0.45±0.44</b>    | <b>0.50±0.40b</b>   |
| Carbohydrates (% kcal/day) -B | <b>9.4±3.7</b>     | <b>8.3±3.1a</b>   | <b>9.3±3.1b</b>     | 9.2±3.3            | <b>8.3±3.1</b>    | <b>9.5±3.2b</b>      | <b>9.6±3.9</b>   | <b>8.3±3.1a</b>     | <b>9.1±2.9b</b>     |
| Simple sugar (% kcal/day) -B  | <b>5.9±2.3</b>     | <b>5.1±2.0a</b>   | <b>5.6±2.2ab</b>    | 5.9±1.8            | <b>5.1±2.0a</b>   | <b>5.7±2.2b</b>      | <b>5.9±2.6</b>   | <b>5.1±1.9a</b>     | <b>5.3±2.1a</b>     |
| Free sugar (% kcal/day) -B    | <b>3.1±1.5</b>     | <b>2.3±1.4a</b>   | <b>2.1±1.4ab</b>    | <b>3.1±1.5</b>     | <b>2.4±1.6a</b>   | <b>2.2±1.4a</b>      | <b>3.1±1.6</b>   | <b>2.3±1.2a</b>     | <b>2.1±1.3a</b>     |
| Fibre (g/day) -B              | <b>1.61±1.01</b>   | <b>1.60±1.04</b>  | <b>2.27±2.48ab</b>  | <b>1.58±0.91</b>   | <b>1.54±0.94</b>  | <b>2.41±2.97ab</b>   | <b>1.63±1.09</b> | <b>1.65±1.13a</b>   | <b>2.11±1.67b</b>   |
| Calcium(mg/day) -B            | <b>305.5±137.9</b> | <b>316.3±93.9</b> | <b>335.4±98.1ab</b> | <b>298.1±134.2</b> | <b>305.5±95.2</b> | <b>335.6±102.1ab</b> | 312.0±141.6      | 327.1±91.5          | 335.3±93.1          |
| <b>Daily dietary intake</b>   |                    |                   |                     |                    |                   |                      |                  |                     |                     |
| HEI-2015 (score) # -SB        | <b>57.3±8.8</b>    | <b>58.1±8.7</b>   | <b>61.1±7.9ab</b>   | <b>58.4±8.9</b>    | <b>59.1±9.0</b>   | <b>62.2±7.5ab</b>    | <b>56.4±8.7</b>  | <b>57.0±8.3</b>     | <b>59.6±8.1ab</b>   |
| Energy intake (kcal/day) -SB  | <b>2033±355</b>    | <b>2115±369a</b>  | <b>2127±325 # a</b> | <b>2004±326</b>    | 2057±364          | <b>2098±317a</b>     | <b>2058±378</b>  | <b>2173±366a</b>    | 2163±332#           |
| Underestimation (%) - S       | <b>2.4±20.4</b>    | -1.6±22.6         | <b>-3.8±23.9a</b>   | -5.9±19.5          | -9.8±23.3         | -13.2±23.3#          | 9.7±18.4         | 6.6±18.6            | 8.0±18.8#           |
| Proteins (% kcal/day)         | <b>15.3±2.3</b>    | 15.5±2.3          | <b>15.8±2.4a</b>    | 15.5±2.1           | 15.5±2.4          | 15.9±2.3             | 15.2±2.5         | 15.4±2.2            | 15.7±2.4            |
| Lipids (% kcal/day)           | 42.2±5.4           | 41.6±4.8          | 41.9±4.5            | 42.2±4.6           | 41.8±5.0          | 41.7±4.4             | 42.1±6.0         | 41.5±4.5            | 42.0±4.6#           |
| SFA (% kcal/day)              | 14.4±2.5           | 14.5±2.1          | 14.3±2.0#           | 14.4±2.3           | 14.2±2.2          | 14.2±1.9#            | 14.4±2.6         | 14.7±2.0            | 14.5±2.0            |
| MUFA (% kcal/day)             | 16.9±2.9           | 16.9±2.8          | 16.9±2.6#           | 16.9±2.6           | 17.0±2.9          | 16.8±2.7             | 16.9±3.1         | 16.8±2.7            | 17.0±2.6#           |
| PUFA (% kcal/day) -S          | 5.9±1.7            | 5.8±1.8           | 5.9±1.7             | 6.1±1.8            | 6.1±1.9           | 6.0±1.8              | 5.8±1.7          | 5.5±1.6             | 5.8±1.6#            |
| Carbohydrates (% kcal/day)    | 41.0±5.6           | 41.3±5.2          | 40.7±4.7            | 40.8±4.6           | 41.1±5.6          | 40.7±4.4             | 41.3±6.4         | 41.5±4.8            | 40.6±5.0#           |
| Simple sugar (% kcal/day)     | 20.5±4.8           | 20.5±4.5          | 20.3±4.6            | 20.8±4.7           | 20.2±4.7          | 20.3±4.2             | 20.3±5.0         | 20.7±4.2            | 20.2±5.0            |
| Free sugar (% kcal/day) -B    | <b>9.5±3.8</b>     | <b>8.9±3.6</b>    | <b>7.8±3.4ab</b>    | <b>9.3±3.5</b>     | <b>8.9±3.8</b>    | <b>7.5±3.4ab</b>     | <b>9.6±4.0</b>   | <b>8.9±3.4</b>      | <b>8.1±3.5ab</b>    |
| Fibre (g/day) -B              | <b>15.2±4.5</b>    | <b>16.3±4.7a</b>  | <b>16.9±4.8ab</b>   | <b>15.2±4.0</b>    | <b>16.1±4.7</b>   | <b>17.1±5.1ab</b>    | <b>15.2±4.9</b>  | <b>16.5±4.8a</b>    | <b>16.6±4.4a</b>    |
| Calcium(mg/day) -SB           | <b>904±225.9</b>   | <b>967±224.8a</b> | <b>991±212.4a</b>   | <b>889±227.1</b>   | <b>930±206.2</b>  | <b>983±218.8ab</b>   | <b>917±225.4</b> | <b>1.004±236.9a</b> | <b>1000±204.5#a</b> |

Data are shown as mean ± standard deviation. T1: <4 points, T2: 4 points and T3: >4 points. MUFA: monounsaturated fatty acids; PUFA: polyunsaturated; SFA: saturated fatty acids. HEI-2015: healthy eating index. Most variables follow a non-parametric distribution; variables with normal distribution were marked (#). For comparison of means, the Mann–Whitney U-test was used if the distribution of variables was not normal, and Student's t-test for normal distributions. Two-way ANOVA analysis: S: differences by sex; B: differences by BQI score. Significant differences are indicated by letters and bold type (a: differences with T1, b: differences with T2, p<0.05).

**Table S3.** Dietary data for breakfast and daily, according to sex and HOMA-IR.

|                                    | Total                    |                         | Girls                    |                         | Boys                     |                         |
|------------------------------------|--------------------------|-------------------------|--------------------------|-------------------------|--------------------------|-------------------------|
|                                    | HOMA-IR<br>≤3.16 (n=808) | HOMA-IR<br>>3.16 (n=44) | HOMA-IR<br>≤3.16 (n=409) | HOMA-IR<br>>3.16 (n=31) | HOMA-IR<br>≤3.16 (n=399) | HOMA-IR<br>>3.16 (n=13) |
| <b>Dietary intake at breakfast</b> |                          |                         |                          |                         |                          |                         |
| Fruits and juice(g/day) – S        | 29.0±57.4                | 38.0±56.0               | <b>31.9±59.1</b>         | <b>49.5±61.6*</b>       | 25.9±55.4                | 10.7±24.9               |
| Fruit (g/day)                      | 7.9±28.8                 | 3.4±10.7                | 8.8±30.1                 | 4.6±12.6                | 7.1±27.3                 | 0.5±1.7                 |
| Juices (g/day) -S                  | <b>21.0±50.3</b>         | <b>34.7±54.3*</b>       | <b>23.1±52.5</b>         | <b>44.9±60.1*</b>       | 18.9±47.9                | 10.3±25.0               |
| Dairy (g/day)                      | 202.2±69.1               | 190.8±55.4              | 199.9±69.8               | 188.4±60.3              | 204.6±68.4               | 196.4±43.4              |
| Cereals (g/day)                    | 15.4±18.5                | 13.9±14.2               | 16.1±18.4                | 13.8±14.2               | 14.6±18.7                | 14.2±14.8               |
| Olive oil(g/day) -R                | 0.54±1.49                | 0.91±2.83               | 0.53±1.45                | 1.23±3.32               | 0.55±1.53                | 0.16±0.47               |
| Butter or margarine(g/day)         | <b>1.90±3.98</b>         | <b>3.39±5.49*</b>       | 1.84±3.72                | 3.79±6.21               | 1.96±4.23                | 2.44±3.16               |
| Butter (g/day) – I                 | <b>1.26±3.24</b>         | <b>2.96±5.44*</b>       | <b>1.20±3.24</b>         | <b>3.50±6.28*</b>       | 1.32±3.25                | 1.67±2.26               |
| Margarine (g/day)                  | 0.64±2.62                | 0.43±1.38               | 0.64±2.19                | 0.28±1.11               | 0.65±2.99                | 0.77±1.88               |
| Energy intake (kcal/day)           | 370±139                  | 380±132                 | 359±129                  | 390±138                 | 382±148                  | 356±118                 |
| Energy intake (% kcal/day)         | 17.6±5.7                 | 19.4±7.3                | 17.4±5.6                 | 19.6±7.5                | 17.8±5.8                 | 18.7±7.0                |
| Proteins (% kcal/day)              | 2.16±0.82                | 2.22±0.76               | 2.18±0.73                | 2.21±0.78               | 2.14±0.91                | 2.25±0.73               |
| Lipids (% kcal/day)                | 6.3±2.8                  | 7.5±3.5                 | <b>6.1±2.8</b>           | <b>7.8±3.8*</b>         | 6.6±2.9                  | 6.6±2.5                 |
| SFA (% kcal/day)                   | 3.0±1.3                  | 3.5±1.6                 | <b>2.9±1.3</b>           | <b>3.6±1.7*</b>         | 3.2±1.3                  | 3.3±1.4                 |
| MUFA (% kcal/day) -R               | <b>1.9±1.1</b>           | <b>2.4±1.6*</b>         | <b>1.9±1.0</b>           | <b>2.6±1.8*</b>         | 2.0±1.1                  | 1.9±0.8                 |
| PUFA (% kcal/day)                  | <b>0.48±0.41</b>         | <b>0.58±0.36*</b>       | <b>0.48±0.37</b>         | <b>0.63±0.39*</b>       | 0.49±0.45                | 0.47±0.26               |
| Carbohydrates (% kcal/day)         | 8.9±3.2                  | 9.3±3.6                 | 8.9±3.2                  | 9.4±3.4                 | 8.8±3.2                  | 9.0±4.1                 |
| Simple sugar (% kcal/day)          | 5.4±2.1                  | 5.7±2.2                 | 5.5±2.1                  | 5.7±2.1                 | 5.4±2.1                  | 5.6±2.6                 |
| Free sugar (% kcal/day)            | 2.4±1.5                  | 2.4±1.5                 | 2.4±1.5                  | 2.3±1.6                 | 2.4±1.4                  | 2.5±1.4                 |
| Fibre (g/day) – SR                 | 1.84±1.29                | 2.55±5.68               | 1.85±1.20                | 3.00±6.73               | 1.83±1.38                | 1.50±1.00               |
| Calcium(mg/day)                    | 322.7±106.6              | 312.0±83.6              | 317.8±107.6              | 312.7±92.4              | 327.6±105.4              | 310.2±61.0              |
| <b>Daily dietary intake</b>        |                          |                         |                          |                         |                          |                         |
| HEI-2015 (score)                   | 59.2±8.5                 | 57.3±8.6#               | 60.5±8.4                 | 57.8±9.4                | 57.9±8.5                 | 56.1±6.4#               |
| Energy intake (kcal/day) #         | <b>2110±350</b>          | <b>2004±334*</b>        | 2071±337                 | 1998±361                | 2150±360                 | 2019±270                |
| Underestimation (%) – SI           | <b>-2.1±22.8</b>         | <b>5.0±22.2*</b>        | <b>-11.4±22.7</b>        | <b>-1.4±22.0*</b>       | <b>7.4±18.6</b>          | <b>20.1±14.6# *</b>     |

|                            | Total                    |                         | Girls                    |                         | Boys                     |                         |
|----------------------------|--------------------------|-------------------------|--------------------------|-------------------------|--------------------------|-------------------------|
|                            | HOMA-IR<br>≤3.16 (n=808) | HOMA-IR<br>>3.16 (n=44) | HOMA-IR<br>≤3.16 (n=409) | HOMA-IR<br>>3.16 (n=31) | HOMA-IR<br>≤3.16 (n=399) | HOMA-IR<br>>3.16 (n=13) |
| Proteins (% kcal/day)      | 15.6±2.3                 | 15.7±2.3                | 15.6±2.3                 | 15.6±2.1                | 15.5±2.3                 | 15.9±2.9                |
| Lipids (% kcal/day) #      | 41.8±4.8                 | 42.1±5.2                | 41.8±4.7                 | 42.1±4.4                | 41.8±4.8                 | 42.1±6.8                |
| SFA (% kcal/day)           | 14.4±2.1                 | 14.7±2.2#               | 14.2±2.1                 | 14.7±2.2#               | 14.6±2.1                 | 14.9±2.5                |
| MUFA (% kcal/day) #        | 16.9±2.7                 | 17.1±3.0                | 16.9±2.8                 | 17.2±2.7                | 16.9±2.7                 | 16.7±3.7                |
| PUFA (% kcal/day)          | 5.9±1.7                  | 5.5±1.8                 | <b>6.1±1.8</b>           | <b>5.5±1.8# *</b>       | 5.7±1.6                  | 5.6±1.8                 |
| Carbohydrates (% kcal/day) | 41.0±5.1                 | 40.5±4.9#               | 40.9±5.0                 | 40.6±4.4#               | 41.2±5.2                 | 40.4±6.3                |
| Simple sugar (% kcal/day)  | 20.4±4.6                 | 20.4±3.9                | 20.3±4.5                 | 20.5±3.8                | 20.4±4.7                 | 20.3±4.4#               |
| Free sugar (% kcal/day)    | 8.5±3.6                  | 8.4±3.7                 | 8.4±3.6                  | 8.1±3.4                 | 8.7±3.6                  | 9.0±4.4#                |
| Fibre (g/day)              | 16.3±4.6                 | 17.3±7.4                | 16.3±4.5                 | 17.3±8.4                | 16.2±4.7                 | 17.2±4.3                |
| Calcium(mg/day)            | 964.0±224.3              | 983.5±174.4             | 943.9±220.7              | 981.8±173.0             | 984.5±226.3              | 987.4±184.5#            |

Data are shown as mean ± standard deviation. MUFA: monounsaturated fatty acids; PUFA: polyunsaturated; SFA: saturated fatty acids. HEI-2015: healthy Eating Index. Most variables follow a non-parametric distribution; variables with normal distribution were marked (#). For comparison of means, the Mann–Whitney U-test was used if the distribution of variables was not normal, and Student's t-test for normal distributions. Two-way ANOVA analysis: S: differences according to sex; I: differences according to insulin resistance (IR) score; R: interaction between sex and IR. Differences according to HOMA-IR are indicated with an asterisk and bold type (\*p<0.05).
